# Supplementary material for: Somatic mutations in telomerase promoter counterbalance germline loss-of-function mutations
Source: JCI journal article supplement (doi:10.1172/jci91161), 2017-02-12
Supplement: sd1 [file 1]

## Supplemental Methods

### *Subjects*

The study was approved by the institutional review board at the University of Texas Southwestern Medical Center. Written informed consent was obtained from all participants prior to their participation in the study.

### *Samples*

Genomic DNA was isolated from circulating leukocytes using AutoPure (Qiagen) according to the manufacturer's instructions. Genomic DNA samples were sequenced from individuals with a rare mutation in *TERT* (n=137), *TERC* (n=10), *PARN* (n=32), or *RTEL1* (n=20), representing 44, 6, 8 and 7 different mutations, respectively. All exons of *TERT* and *TERC* were Sanger sequenced. *PARN* and *RTEL1* were sequenced by whole exome capture and next generation sequencing(1). All variants in these four genes were confirmed by Sanger sequencing. Genomic DNA samples from circulating leukocytes of the DHS2 cohort, a multiethnic population-based probability sample of Dallas County, were isolated using identical methods. Genomic DNA isolated from EBV-transformed lymphoblastoid cell lines from 100 Whites (AGPLONG3) and 32 African Americans (AGPLONG5), ranging in age from 98-108, were obtained from the Coriell Institute.

### *Sequencing and Allelic Discrimination (AD) Assay*

Sanger sequencing of the *TERT* promoter was performed using the oligonucleotides listed in **Supplemental Table 5**, LA Taq DNA polymerase (Takara Clontech) and GC buffer I for 30 cycles. Negative controls (no DNA) were included in each experiment. Taqman allelic discrimination assays were used to test for both *TERT* promoter mutations in the DHS2 cohort. A 1:1 dilution of the PCR product generated for Sanger sequencing (see above) was the substrate for each AD assay. The oligonucleotides and probes for querying the -124 C/T mutation (also known as C228T, chr5:1,295,228 C>T) were purchased from Life Technologies (*TERT*\_228; Cat# 4332072). The oligonucleotides and probes for querying the -146 C/T mutation (also known as C250T, chr5: 1,295,250 C>T) are listed in **Supplemental Table 5**. Sanger sequencing of the 132 DNA samples from centenarians was performed using the

Accuprime GC-rich DNA polymerase (ThermoFischer) with 1x BufferA, 5% DMSO, 1M Betaine and oligonucleotides listed in **Supplemental Table 5**.

#### *Flow cytometry*

Blood samples (1 ml) from subjects were stained with fluorochrome-conjugated antibodies and sorted by flow cytometry (FACS Aria SORP 5 instrument) into four populations: granulocytes (CD66b-APC positive, eBioscience #17-0666), monocytes (CD14-PE positive, Tonbo Bio #35-9459), T-cells (CD3-VioletFluor450 positive, Tonbo Bio #75-0037), and B-Cells (CD19-PerCP-Cy5.5 positive, Tonbo Bio #65-0199). Genomic DNA was isolated from each cell fraction using QiaAmp columns (Qiagen).

#### *Limiting dilution PCR*

Phasing of the *TERT* promoter and coding DNA sequence (CDS) mutations were assessed by Sanger sequencing after two rounds of nested PCR. First-round, multiplex PCR was carried out in a single tube that contained primers that amplified both the promoter and CDS with comparable efficiency. PCR of diluted genomic DNA (approximately ~1 pg) was performed using Hotstar Taq polymerase (Qiagen) in 2-4% DMSO and 5x Q-solution for 35-40 cycles. One  $\mu$ L of the first round PCR product was used as a template to amplify the promoter and CDS regions in parallel separate PCR reactions using the appropriate nested primers (**Supplemental Table 5**). PCR products from second-round PCR were gel purified prior to sequencing if two different sized products were detected. At least 10 independent PCR reactions were performed and analyzed so that Sanger sequencing of the PCR products revealed single nucleotide peaks.

#### *Telomere length assays*

Telomere lengths of genomic DNA specimens were measured using a quantitative PCR assay as previously described(2). Flow-FISH telomere lengths were measured by Repeat Diagnostics Inc. (Vancouver, Canada).

#### *Cell culture*

Epstein-Barr virus (EBV)-transformed LCLs were established by incubating  $\sim 1 \times 10^6$  isolated lymphocytes with EBV shed from a marmoset cell line (B95-8, American Type Culture Collection) and the mitogen phytohemagglutinin. The cell lines were cultured in RPMI 1640 (HyClone) supplemented with 15% FBS, 2 mM L-glutamine, 1 mM pyruvate, penicillin (100 U/ml) and streptomycin (100  $\mu$ g/ml), fed twice weekly and expanded to a suspension culture volume of at least 50 ml before storage and use.

#### *Telomere Repeat Amplification Protocol*

Cy5 fluorescent gel-based whole cell telomere repeat amplification protocol (TRAP) was performed as described(3). Prior to harvesting the cell lysates the cell cultures were first treated with 5 mM thymidine (Sigma) for 20 hours followed by 5  $\mu$ g/ml aphidicolin (Sigma) for 16 hour to synchronize cells as described(4). A serial dilution (125-fold) of the protein extracts from each cell line was made and an appropriate volume of cell extract was selected that produced a linear response in all cell lines. Extension products were analyzed by visualizing the polyacrylamide gel on a Typhoon 9410 instrument. Data represent mean  $\pm$  SD.

#### *Quantitative PCR*

RNA was isolated from pelleted LCLs using TRIzol (Ambion). After DNase I treatment, first-strand cDNA was generated using random hexamers and the High-Capacity cDNA Reverse Transcription kit (Applied Biosystems). qRT PCR reactions were performed using SYBR GreenER™ qPCR SuperMix (Invitrogen) with the following conditions: 50°C of 2 min, 95°C for 10 min, followed by 40 cycles of 95°C for 15 sec, 60°C for 1 min, ending with a melt curve. Oligonucleotides used to amplify genes are listed in **Supplemental Table 5**. Data represent mean  $\pm$  SD. Experiments were performed 3 times and a representative experiment is shown.

#### *Lymphoblastoid cell line proliferation assay*

After synchronization of cell cultures with thymidine/aphidicolin as described above, cells were stained with CellTrace™ (Molecular Probes) as described(5). After four days, cells were sorted by flow cytometry (FACS Aria instrument) into three populations: low, medium and rapidly proliferating cells, each representing  $\sim 20\%$  of all cells. Genomic DNA was isolated from each cell subpopulation using QiaAmp

columns (Qiagen) and PCR amplification of the *TERT* promoter mutation was performed across all samples in a single experiment as described above.

## References

1. Stuart BD, Choi J, Zaidi S, Xing C, Holohan B, Chen R, Choi M, Dharwadkar P, Torres F, Girod CE, et al. Exome sequencing links mutations in PARN and RTEL1 with familial pulmonary fibrosis and telomere shortening. *Nat Genet.* 2015;47(5):512-7.
2. Stuart BD, Lee JS, Kozlitina J, Noth I, Devine MS, Glazer CS, Torres F, Kaza V, Girod CE, Jones KD, et al. Effect of telomere length on survival in patients with idiopathic pulmonary fibrosis: an observational cohort study with independent validation. *The lancet Respiratory medicine.* 2014;2(7):557-65.
3. Herbert B, Hochreiter AE, Wright WE, and Shay JS. Nonradioactive detection of telomerase activity using the telomeric repeat amplification protocol. *Nature Protocols.* 2006;1(3):1583-9.
4. Zhu X, Kumar R, Mandal M, Sharma N, Sharma HW, Dhingra U, Sokoloski JA, Hsiao R, and Narayanan R. Cell cycle-dependent modulation of telomerase activity in tumor cells. *Proc Natl Acad Sci U S A.* 1996;93(12):6091-5.
5. Quah BJ, Warren HS, and Parish CR. Monitoring lymphocyte proliferation in vitro and in vivo with the intracellular fluorescent dye carboxyfluorescein diacetate succinimidyl ester. *Nat Protoc.* 2007;2(9):2049-56.

**Supplemental Table 1. Subjects with Telomere-related Gene Coding Sequence Mutations**

| Gene         | DNA Change*          | Impact on Protein* | No. of Subjects sequenced for <i>TERT</i> promoter mutations | No. of Subjects with -124C>T <i>TERT</i> promoter mutation | No. of Subjects with -146C>T <i>TERT</i> promoter mutation |
|--------------|----------------------|--------------------|--------------------------------------------------------------|------------------------------------------------------------|------------------------------------------------------------|
| <i>TERT</i>  | c.97C>T              | p.Pro33Ser         | 2                                                            |                                                            |                                                            |
| <i>TERT</i>  | c.293C>A             | p.Ala98Asp         | 1                                                            |                                                            |                                                            |
| <i>TERT</i>  | c.377C>A             | p.Thr126Lys        | 2                                                            |                                                            |                                                            |
| <i>TERT</i>  | c.416T>G             | p.Leu139Arg        | 1                                                            |                                                            |                                                            |
| <i>TERT</i>  | c.430G>A             | p.Val144Met        | 15                                                           | 1                                                          |                                                            |
| <i>TERT</i>  | c.569C>T             | p.Ala190Val        | 1                                                            |                                                            |                                                            |
| <i>TERT</i>  | c.1002_1004delCTC    | p.Ser335del        | 2                                                            |                                                            |                                                            |
| <i>TERT</i>  | c.1397G>C            | p.Arg466Pro        | 1                                                            |                                                            |                                                            |
| <i>TERT</i>  | c.1417G>C            | p.Val473Leu        | 1                                                            |                                                            |                                                            |
| <i>TERT</i>  | c.1456C>T            | p.Arg486Cys        | 6                                                            |                                                            |                                                            |
| <i>TERT</i>  | c.1710G>T            | p.Lys570Asn        | 1                                                            | 1                                                          |                                                            |
| <i>TERT</i>  | c.1892G>A            | p.Arg631Gln        | 8                                                            | 1                                                          |                                                            |
| <i>TERT</i>  | c.1895C>T            | p.Pro632Leu        | 2                                                            | 1                                                          |                                                            |
| <i>TERT</i>  | c.2006C>T            | p.Arg669Gln        | 1                                                            |                                                            |                                                            |
| <i>TERT</i>  | c.2011C>T            | p.Arg671Trp        | 1                                                            |                                                            |                                                            |
| <i>TERT</i>  | c.2033C>A            | p.Ala678Asp        | 1                                                            |                                                            |                                                            |
| <i>TERT</i>  | c.2080G>A            | p.Val694Met        | 1                                                            |                                                            |                                                            |
| <i>TERT</i>  | c.2105C>T            | p.Pro702Leu        | 19                                                           |                                                            |                                                            |
| <i>TERT</i>  | c.2110C>T            | p.Pro704Ser        | 3                                                            |                                                            |                                                            |
| <i>TERT</i>  | c.2240delT           | p.Val747ValfsX32   | 6                                                            | 1                                                          |                                                            |
| <i>TERT</i>  | c.2266C>T            | p.Arg756Cys        | 1                                                            |                                                            |                                                            |
| <i>TERT</i>  | c.[2431C>T;2433C>T]‡ | p.Arg811Cys        | 2                                                            |                                                            |                                                            |
| <i>TERT</i>  | c.2469-2A>T          | Splicing           | 3                                                            |                                                            | 1                                                          |
| <i>TERT</i>  | c.2521C>T            | p.Leu841Phe        | 1                                                            |                                                            |                                                            |
| <i>TERT</i>  | c.2539G>A            | p.Gly847Ser        | 1                                                            |                                                            |                                                            |
| <i>TERT</i>  | c.2572C>T            | p.Arg858Trp        | 1                                                            |                                                            |                                                            |
| <i>TERT</i>  | c.2581G>A            | p.Gly861Arg        | 4                                                            |                                                            |                                                            |
| <i>TERT</i>  | c.2593C>T            | p.Arg865Cys        | 2                                                            |                                                            |                                                            |
| <i>TERT</i>  | c.2594G>A            | p.Arg865His        | 11                                                           |                                                            | 1                                                          |
| <i>TERT</i>  | c.2599G>A            | p.Val867Met        | 1                                                            |                                                            |                                                            |
| <i>TERT</i>  | c.2621C>G            | p.Thr874Arg        | 3                                                            |                                                            |                                                            |
| <i>TERT</i>  | c.2647T>A            | p.Phe883Ile        | 1                                                            | 1                                                          |                                                            |
| <i>TERT</i>  | c.2701C>T            | p.Arg901Trp        | 2                                                            |                                                            |                                                            |
| <i>TERT</i>  | c.2775C>A            | p.His925Gln        | 1                                                            |                                                            |                                                            |
| <i>TERT</i>  | c.2851C>T            | p.Arg951Trp        | 4                                                            |                                                            |                                                            |
| <i>TERT</i>  | c.2869A>C            | p.Ser957Arg        | 2                                                            |                                                            |                                                            |
| <i>TERT</i>  | c.2947C>T            | p.His983Tyr        | 1                                                            |                                                            |                                                            |
| <i>TERT</i>  | c.2991delG           | p.Val997ValfsX52   | 9                                                            | 1                                                          |                                                            |
| <i>TERT</i>  | c.3055C>T            | p.Leu1019Phe       | 1                                                            |                                                            |                                                            |
| <i>TERT</i>  | c.3148A>G            | p.Lys1050Glu       | 2                                                            |                                                            |                                                            |
| <i>TERT</i>  | c.3150G>C            | p.Lys1050Asn       | 3                                                            |                                                            |                                                            |
| <i>TERT</i>  | c.3187G>A            | p.Gly1063Ser       | 2                                                            |                                                            |                                                            |
| <i>TERT</i>  | c.3202G>A            | p.Glu1068Lys       | 2                                                            |                                                            |                                                            |
| <i>TERT</i>  | c.3346_3522del177    | p.Glu1116fsX11     | 2                                                            |                                                            |                                                            |
| <i>TERC</i>  | r.11g>t              |                    | 1                                                            |                                                            |                                                            |
| <i>TERC</i>  | r.37a>g              |                    | 4                                                            |                                                            |                                                            |
| <i>TERC</i>  | r.66c>a              |                    | 1                                                            |                                                            |                                                            |
| <i>TERC</i>  | r.116c>t             |                    | 1                                                            |                                                            |                                                            |
| <i>TERC</i>  | r.182g>c             |                    | 2                                                            |                                                            |                                                            |
| <i>TERC</i>  | r.234c>g             |                    | 1                                                            |                                                            |                                                            |
| <i>RTEL1</i> | c.602delG            | p.Gly201GluX15     | 3                                                            |                                                            |                                                            |
| <i>RTEL1</i> | c.1451C>T            | p.Pro484Leu        | 8                                                            |                                                            |                                                            |
| <i>RTEL1</i> | c.1940C>T            | p.Pro647Leu        | 1                                                            |                                                            |                                                            |
| <i>RTEL1</i> | c.2005C>T            | p.Gln669X          | 4                                                            |                                                            |                                                            |
| <i>RTEL1</i> | c.2063C>G            | p.Ser688Cys        | 1                                                            |                                                            |                                                            |
| <i>RTEL1</i> | c.2205_2207delGAC    | p.Asp736del        | 2                                                            |                                                            |                                                            |
| <i>RTEL1</i> | c.3371A>C            | p.His1124Pro       | 1                                                            |                                                            |                                                            |
| <i>PARN</i>  | c.246-2A>G           | Splicing           | 8                                                            |                                                            |                                                            |
| <i>PARN</i>  | c.529C>T             | p.Gln177X          | 11                                                           | 1                                                          |                                                            |
| <i>PARN</i>  | c.563_564insT        | p.Ile188IlefsX7    | 2                                                            |                                                            |                                                            |
| <i>PARN</i>  | c.751delA            | p.Arg251GluX14     | 1                                                            |                                                            |                                                            |
| <i>PARN</i>  | c.874delG            | p.Asp292ThrfsX16   | 2                                                            |                                                            |                                                            |
| <i>PARN</i>  | c.1081+1G>A          | Splicing           | 2                                                            |                                                            |                                                            |
| <i>PARN</i>  | c.1262A>G            | p.Lys421Arg        | 5                                                            |                                                            |                                                            |
| <i>PARN</i>  | c.1749_1750delAG     | p.Glu585AspfsX4    | 1                                                            |                                                            |                                                            |
| <b>Total</b> |                      |                    | <b>199</b>                                                   | <b>8</b>                                                   | <b>2</b>                                                   |

\*The positions of the DNA, RNA and protein variants are described using *TERT* NM\_198253.2 (isoform 1), *TERC* NR\_001566.1, *PARN* NM\_002582.3 (isoform 1) and *RTEL1* NM\_001283009.1 (isoform 3).

‡Both variants are found in two siblings, suggesting that they in *cis* and on the same allele.

**Supplemental Table 2. Complete Blood Counts for Human Subjects with Somatic *TERT* promoter mutations**

|                               | UT822    | UT2031    | UT3224    | UT387     | UT248     | UT2482 | UT3410  |
|-------------------------------|----------|-----------|-----------|-----------|-----------|--------|---------|
| Age                           | 58       | 55        | 48        | 55        | 48        | 50     | 63      |
| Gender                        | M        | M         | M         | M         | F         | M      | M       |
| <i>TERT</i> CDS Mutation      | V144M    | R631Q     | P632L     | V747fs    | R865H     | F883I  | V997fs  |
| <i>TERT</i> Promoter Mutation | -124     | -124      | -124      | -124      | -146/-124 | -124   | -124    |
| WBC (thousand/uL)             | 6.1      | 7.7       | 8.0       | 7.7       | 7.1       | 9.6    | 7.9     |
| RBC (million/uL)              | 4.21 (L) | 4.39      | 4.01 (L)  | 4.35      | 4.38      | 4.37   | 4.17    |
| Hemoglobin (g/dL)             | 14.4     | 14.5      | 13.2      | 15.2      | 14.3      | 42.5   | 14.2    |
| MCV (fL)                      | 100      | 101.4 (H) | 102.9 (H) | 101.0 (H) | 97.7      | 97     | 103 (H) |
| Platelet (thousand/uL)        | 158      | 166       | 204       | 159       | 227       | 146    | 108 (L) |

Abbreviation: CDS, cDNA sequence; M, male; F, female; WBC, white blood cell count; RBC, red blood cell count; MCV, mean corpuscular volume

A (L) or (H) indicates values that are lower or higher, respectively, than the expected reference range for the laboratory.

**Supplemental Table 3. Extended Lymphocyte Subset Quantification of Human Subjects**

|                        | <b>TERT CDS + Promoter Mutation</b> |          |         | <b>TERT CDS Mutation</b> |       | <b>Family Controls</b> |          |
|------------------------|-------------------------------------|----------|---------|--------------------------|-------|------------------------|----------|
|                        | UT248                               | UT2031   | UT3224  | UT244                    | UT245 | UT246                  | UT3442   |
| Age                    | 59                                  | 55       | 48      | 30                       | 32    | 64                     | 58       |
| Gender                 | F                                   | M        | M       | F                        | F     | M                      | F        |
| TERT CDS Mutation      | R865H                               | R631Q    | P632L   | R865H                    | R865H | none                   | none     |
| TERT Promoter Mutation | -146/-124                           | -124     | -124    | none                     | none  | none                   | none     |
| WBC (thousand/uL)      | 5.5                                 | 7.7      | 8.0     | 2.5 (L)                  | 7.7   | 6.2                    | 8.3      |
| CD3+ (%)               | 66.0                                | 50.6 (L) | 68.5    | 73.5                     | 81.7  | 76.3                   | 80.9     |
| CD3+ (cells/uL)        | 1252                                | 475 (L)  | 921 (L) | 652 (L)                  | 1560  | 1509                   | 1551     |
| CD3+CD4+ (%)           | 48.6                                | 38.8     | 42.2    | 55.6 (H)                 | 47.6  | 55.1 (H)               | 55.6 (H) |
| CD3+CD4+ (cells/uL)    | 922                                 | 365 (L)  | 567     | 493 (L)                  | 908   | 1090                   | 1066     |
| CD3+CD8+ (%)           | 15.5 (L)                            | 10.5 (L) | 24.4    | 17.2 (L)                 | 30.5  | 20.9                   | 20.5     |
| CD3+CD8+ (cells/uL)    | 294 (L)                             | 98 (L)   | 328 (L) | 152 (L)                  | 583   | 413                    | 394      |
| CD4/CD8 Ratio          | 3.1                                 | 3.7      | 1.7     | 3.2                      | 1.6   | 2.6                    | 2.7      |
| CD3-CD19+ (%)          | 15.1                                | 25 (H)   | 16.6    | 8.4                      | 12.1  | 7.5                    | 12.9     |
| CD3-CD19+ (cells/uL)   | 286                                 | 235      | 224     | 75 (L)                   | 231   | 148                    | 246      |
| CD2+ (%)               | 82.5                                | 71.7     | 88.5    | 86.5                     | 86.0  | 84.4                   | 90.2     |
| CD45RO+/CD45RA- (%)    | 49.9                                | 43.0     | 47.2    | 36.4                     | 36.4  | 39.4                   | 54.5     |
| CD45RA+/CD45RO- (%)    | 45.9                                | 53.7     | 47.6    | 58.3                     | 57.5  | 55.8                   | 38.8     |
| TCR-alpha/beta+ (%)    | 63.1                                | 58.4     | 73.9    | 71.8                     | 80.8  | 76.4                   | 76.4     |
| TCR-gamma/delta+ (%)   | 1.3                                 | 1.6      | 1.8     | 1.5                      | 3.0   | 1.2                    | 6.2      |

Abbreviation: CDS, cDNA sequence; M, male; F, female; WBC, white blood cell count; RBC, red blood cell count; MCV, mean corpuscular volume

A (L) or (H) indicates values that are lower or higher, respectively, than the expected reference range. The reference range for the complete blood count was provided by Quest Diagnostics. The reference range for the extended lymphocyte subset panel was provided by the clinical laboratory and based on a published study that evaluated a large number of healthy donors (Sherer et al, J. Allergy Clin. Immunol., 2003, 112(5):973-980).

**Supplemental Table 4. Haplotype analysis of diluted whole blood DNA from different subjects analyzed by limiting dilution PCR of the *TERT* promoter and coding sequence variants**

| Subject ID | No. samples | -146 C>T Promoter Mutation in cis- with |                        | -124 C>T Promoter Mutation in cis- with |                        | Wildtype Promoter in cis-with |                        |
|------------|-------------|-----------------------------------------|------------------------|-----------------------------------------|------------------------|-------------------------------|------------------------|
|            |             | WT <i>TERT</i> CDS                      | Mutant <i>TERT</i> CDS | WT <i>TERT</i> CDS                      | Mutant <i>TERT</i> CDS | WT <i>TERT</i> CDS            | Mutant <i>TERT</i> CDS |
| UT248      | 11          | 4 (36%)                                 | 0                      | 1 (9%)                                  | 0                      | 1 (10%)                       | 5 (45%)                |
| UT822      | 21          | 1 (5%)                                  | 0                      | 5 (24%)                                 | 0                      | 3 (14%)                       | 12 (57%)               |
| UT2923     | 15          |                                         |                        | 6 (40%)                                 | 1 (7%)                 | 1 (7%)                        | 7 (47%)                |
| UT387      | 10          |                                         |                        | 4 (40%)                                 | 0                      | 2 (20%)                       | 4 (40%)                |
| UT2210     | 13          | 5 (38%)                                 | 0                      |                                         |                        | 1 (8%)                        | 7 (54%)                |
| UT2482     | 12          | 4 (33%)                                 | 2 (17%)                |                                         |                        | 4 (33%)                       | 2 (17%)                |

Abbreviation: CDS, cDNA sequence

**Supplemental Table 5. Oligonucleotides used for *TERT* Promoter Sanger Sequencing, Allelic Discrimination (AD) Assay, Limiting Dilution PCR and Quantitative (Q-)RT PCR Assays**

| <b>Assay, Primer</b>                 | <b>Oligonucleotide Name</b> | <b>Oligonucleotide Sequence, 5'→ 3'</b> |
|--------------------------------------|-----------------------------|-----------------------------------------|
| Sanger sequencing and AD assay       | TERT_Prom_A_F               | CTGTGTCAAGGAGCCCAAG                     |
| Sanger sequencing and AD assay       | TERT_Prom_A_R               | AGCACCTCGCGGTAGTGG                      |
| -146 C>T AD assay internal oligo     | TERT_C250T_F                | CTTCCAGCTCCGCTCCT                       |
| -146 C>T AD assay internal oligo     | TERT_C250T_R                | GGGCCGCGGAAAGGAA                        |
| -146 C>T AD assay VIC probe          | VIC Probe                   | VIC-CGACCCCTCCCGG-MGBNFQ                |
| -146 C>T AD assay FAM probe          | FAM Probe                   | FAM-CGACCCCTCCCGG-MGBNFQ                |
| Sequencing DNA from Centenarians     | Out-TERT-F                  | ACGAACGTGGCCAGCGGCAG                    |
| Sequencing DNA from Centenarians     | Out-TERT-R                  | CTGGCGTCCCTGCACCCTGG                    |
| Limiting dilution PCR, outside, CDS  | Out-UT248/UT2210/UT2482-F   | ACCCACTCCCTCCCGAAGGTGCC                 |
| Limiting dilution PCR, outside, CDS  | Out-UT248/UT2210/UT2482-R   | AGCTGGCACAGAAATTGCACAAGCTGATGG          |
| Limiting dilution PCR, inside, CDS   | In-UT248/UT2210/UT2482-F    | AGAGAGAGAGGACTTGCCAGAGAC                |
| Limiting dilution PCR, inside, CDS   | In-UT248/UT2210/UT2482-R    | ACTGTAGAGAGCTCGTCTGTTGG                 |
| Limiting dilution PCR, outside, CDS  | Out-UT387-F                 | CGTGAGGACAATGGTGCGGACCATGCC             |
| Limiting dilution PCR, outside, CDS  | Out-UT387-R                 | TTGGGGTCTGGAGTGGTGGGGGTCAG              |
| Limiting dilution PCR, inside, CDS   | In-UT387-F                  | CAGACACACACACATGCACACC                  |
| Limiting dilution PCR, inside, CDS   | In-UT387-R                  | TGAGGGCAGAGGTGATGTCTG                   |
| Limiting dilution PCR, outside, CDS  | Out-UT822-F                 | GGGCAACGGCAGACTTCGGCTGG                 |
| Limiting dilution PCR, outside, CDS  | Out-UT822-R                 | AGAGCAGCGCAGGCGACTCAGG                  |
| Limiting dilution PCR, inside, CDS   | In-UT822-F                  | CCCTGACGCTATGGTTCCAGG                   |
| Limiting dilution PCR, inside, CDS   | In-UT822-R                  | TGTCCTGCCTGAAGGAGCTG                    |
| Limiting dilution PCR, outside, CDS  | Out-UT2923-F                | CTCCAGCCTGGGCAACAGAGTGAGACTCC           |
| Limiting dilution PCR, outside, CDS  | Out-UT2923-R                | CCCTCGGTGATCTGGATGTGGCATGTCC            |
| Limiting dilution PCR, inside, CDS   | In- UT2923-F                | GAAAGGCAAGGAGGCTAGTGG                   |
| Limiting dilution PCR, inside, CDS   | In- UT2923-R                | AAGTTCCTGCACTGGCTGATG                   |
| Limiting dilution PCR, outside, TERT | Out-TERT-F                  | ACGAACGTGGCCAGCGGCAG                    |
| Limiting dilution PCR, outside, TERT | Out-TERT-R                  | CTGGCGTCCCTGCACCCTGG                    |
| Limiting dilution PCR, inside, TERT  | In-TERT-F                   | ACCTCGCGGTAGTGGCTGC                     |
| Limiting dilution PCR, inside, TERT  | In-TERT-R                   | GTCCCTGCCCCCTTCACCTT                    |
| Q-RT PCR assay for hTERT             | hTERT_F_qPCR                | CGTACAGGTTTCACGCATGTG                   |
| Q-RT PCR assay for hTERT             | hTERT_R_qPCR                | ATGACGCGCAGGAAAAATGT                    |
| Q-RT PCR assay for hCyclophilin      | hCyclophilin_F_qPCR         | ATGTGGTGTGTTGGCAAAGTTCTA                |
| Q-RT PCR assay for hCyclophilin      | hCyclophilin_R_qPCR         | GGTTTATCCCGGCTGTCT                      |
| Q-RT PCR assay for hGAPDH            | hGAPDH_F_qPCR               | ACAGCAACAGGGTGGTGGAC                    |
| Q-RT PCR assay for hGAPDH            | hGAPDH_R_qPCR               | GACCATTGCTGGGGCTGGTG                    |

Supplemental Figure 1

**A. TERT Promoter -124C>T Mutation**

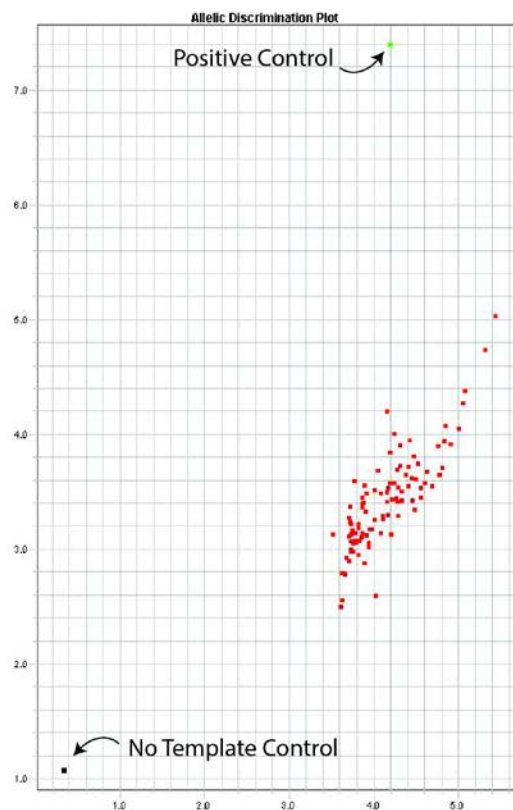

**B. TERT Promoter -146C>T Mutation**

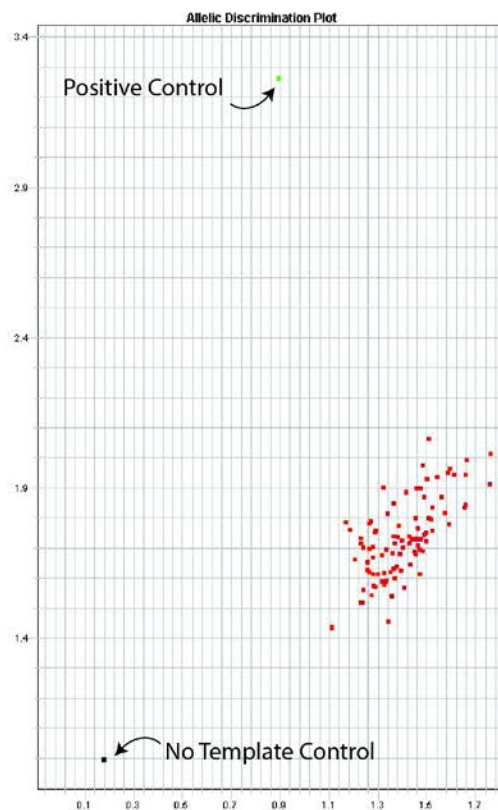

**Supplemental Figure 1. Allelic discrimination assays for detection of the *TERT* -124 C>T (A) and the *TERT* -146 C>T (B) Promoter Mutations.** One representative 96-well plate of samples is shown for each assay. The no template controls and the positive controls for each assay are indicated by arrows.

Supplemental Figure 2

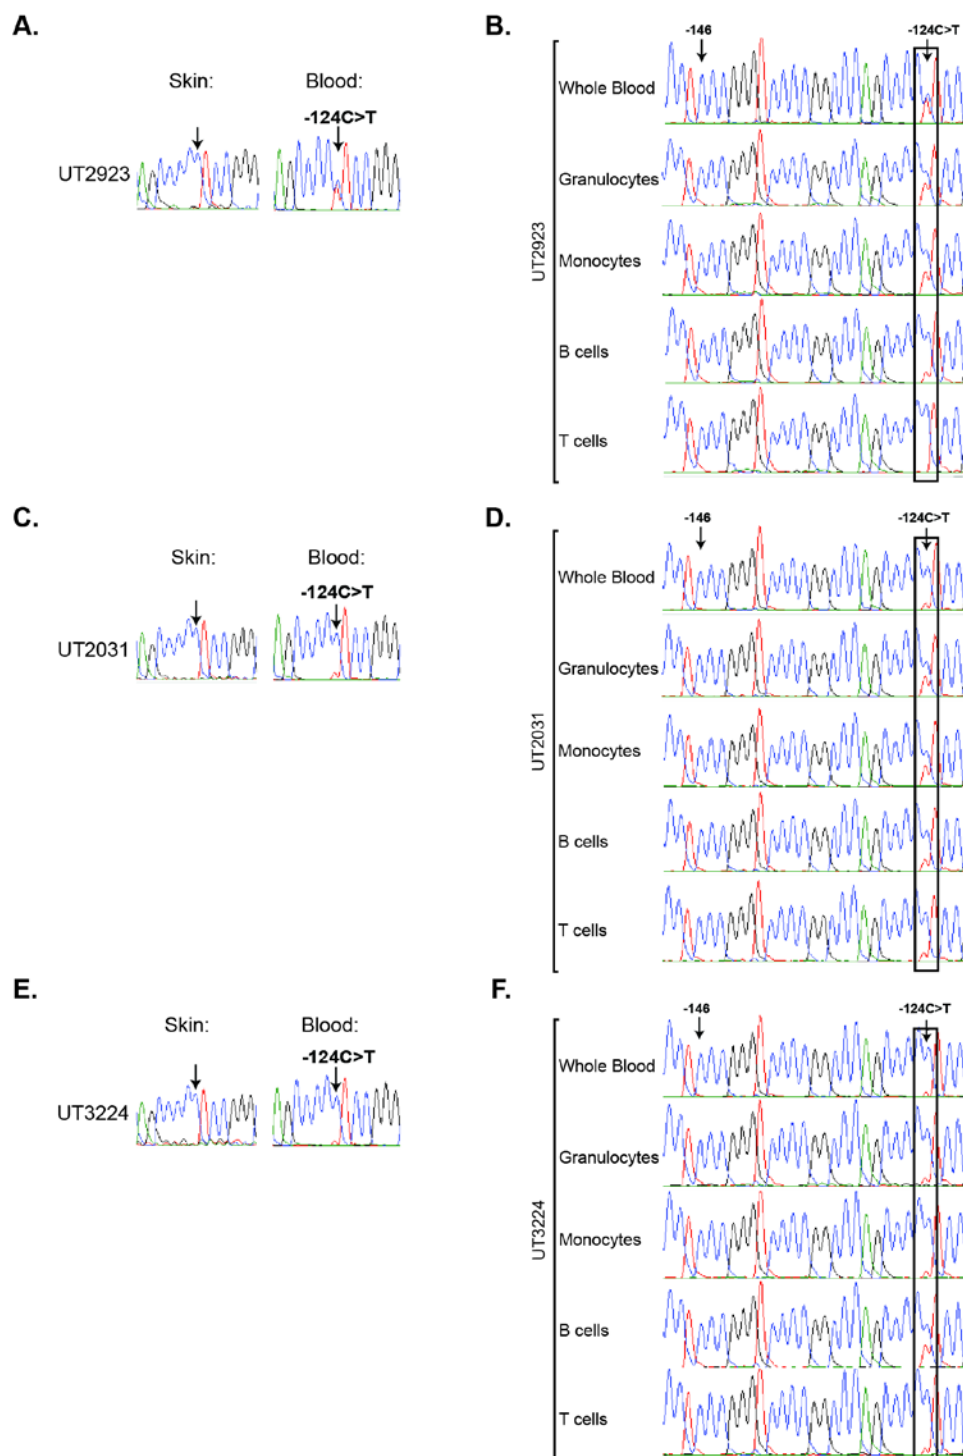

**Supplemental Figure 2. Sanger sequences of the *TERT* promoter from skin, whole blood, granulocytes, monocytes, B cells and T cells of subjects with the *TERT* -124 C>T promoter mutation.** Genomic DNA isolated from whole blood and skin was purified and subjected to Sanger sequencing of the *TERT* promoter (**A**, **C**, **E**). Blood samples were subjected to flow cytometry (see Methods). Genomic DNA from each fraction was purified and subjected to Sanger sequencing of the *TERT* promoter (**B**, **D**, **F**). The location of the -124 C>T mutation is indicated by the box.

Supplemental Figure 3

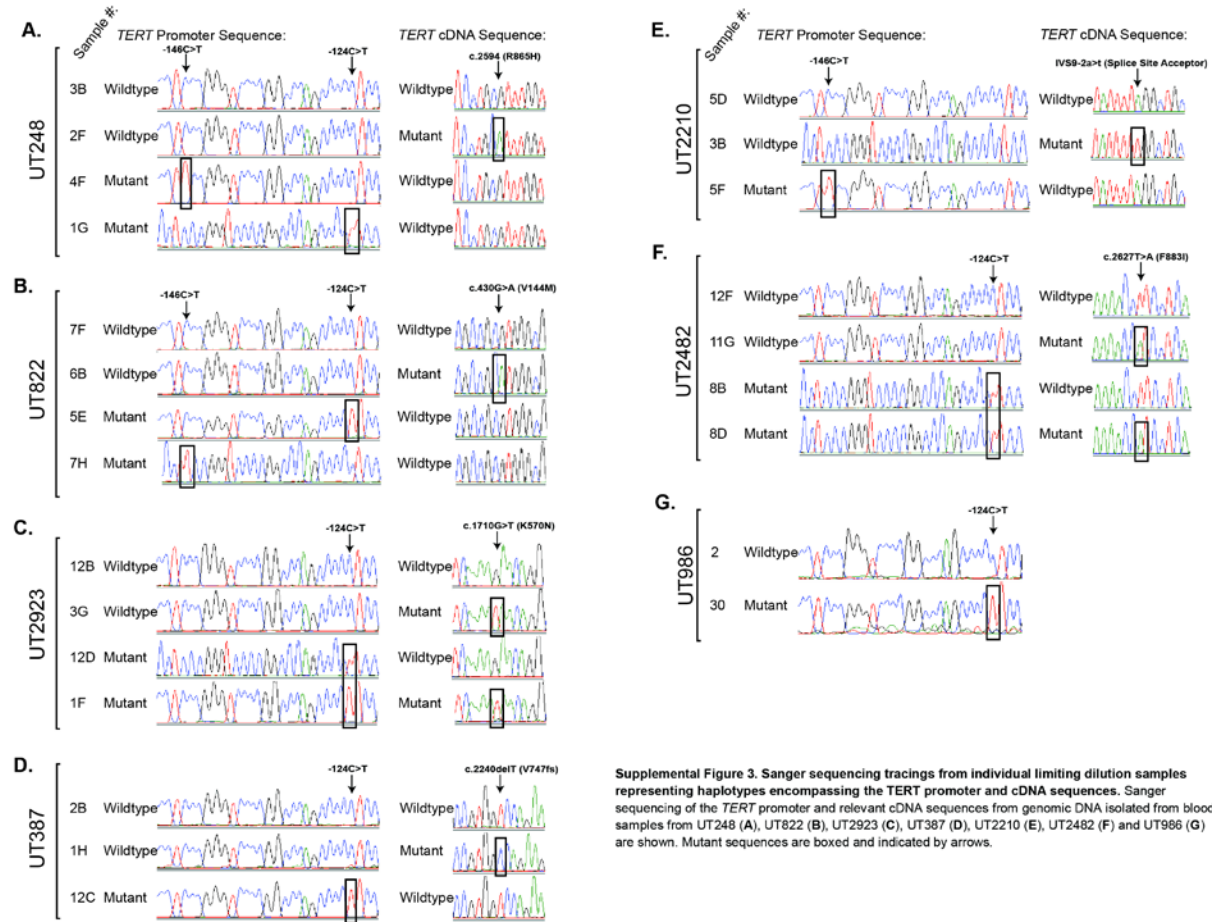

Supplemental Figure 3. Sanger sequencing tracings from individual limiting dilution samples representing haplotypes encompassing the TERT promoter and cDNA sequences. Sanger sequencing of the TERT promoter and relevant cDNA sequences from genomic DNA isolated from blood samples from UT248 (A), UT822 (B), UT2923 (C), UT387 (D), UT2210 (E), UT2482 (F) and UT986 (G) are shown. Mutant sequences are boxed and indicated by arrows.

Supplemental Figure 4

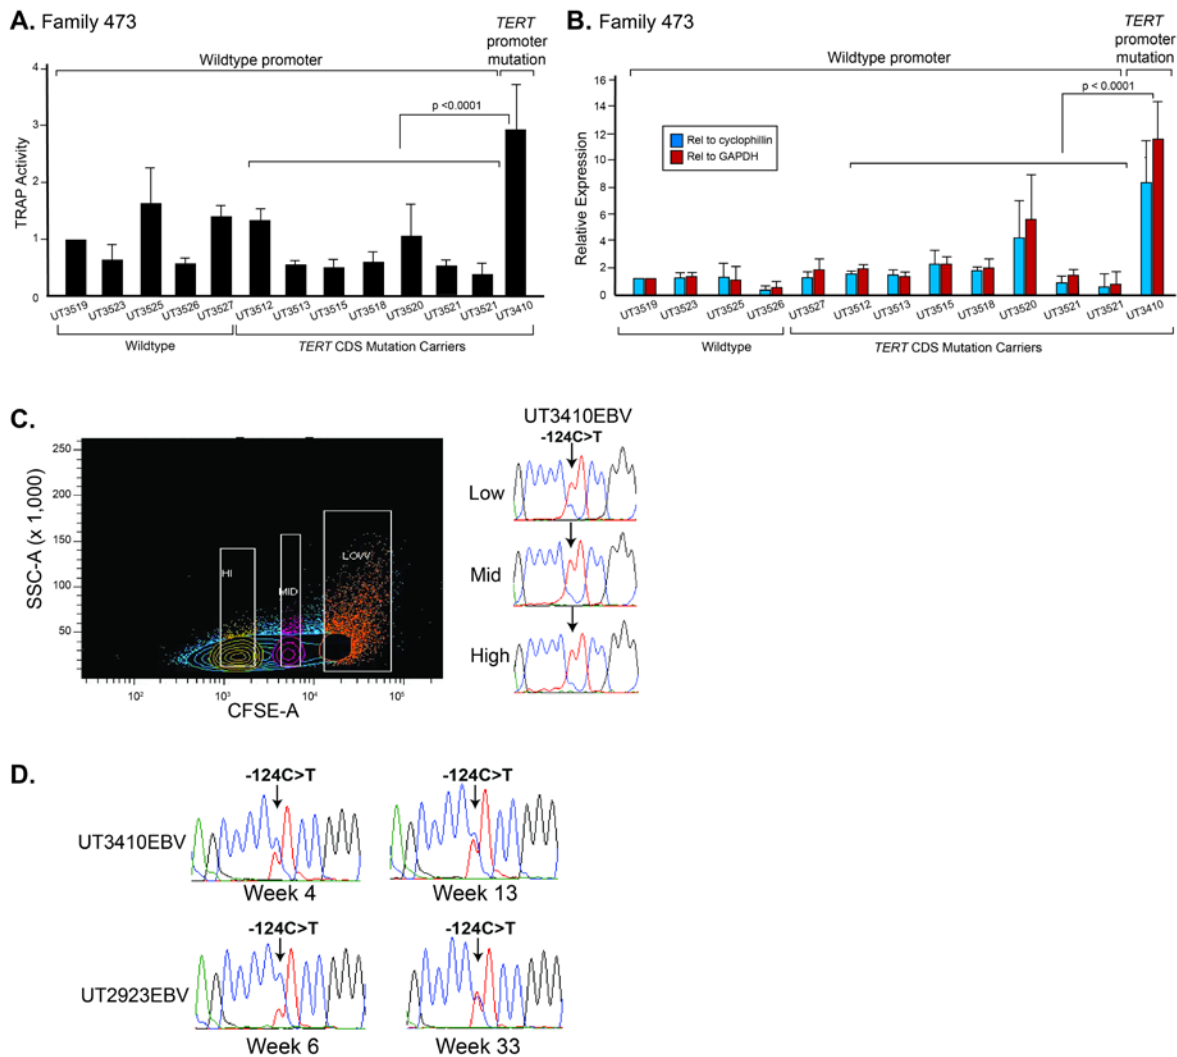

**Supplemental Figure 4. *TERT* promoter mutation is associated with increased telomerase activity and higher proliferative capacity.** **A.** Telomerase (TRAP) activity of equivalent numbers of EBV-transformed lymphoblastoid cells derived from different related individuals from family 473. The data are expressed relative to the activity of a wildtype control and represent the mean  $\pm$  SD of 3 experiments. **B.** Expression of h*TERT* by real-time quantitative PCR relative to hCyclophilin and hGAPDH. The data are expressed relative to a wildtype control and represent the mean  $\pm$  SD of triplicates of one representative experiment. Data was analyzed by a two-tailed Student's t-test in A and B. **C.** Flow sorting to separate EBV-transformed cells by proliferative capacity, followed by Sanger sequencing of the *TERT* promoter. **D.** Sanger sequencing of the *TERT* promoter from genomic DNA purified from the UT3410 and UT2923 EBV lymphoblastoid cell lines over time.
